# Supplementary material
Source: Springer Nature journal article supplement (https://www.springermedizin.de/resource/supplementary/12889_2008_1090_MOESM1_ESM.pdf/9502434)

# Injury Rates: Yorkhill vs Kingston

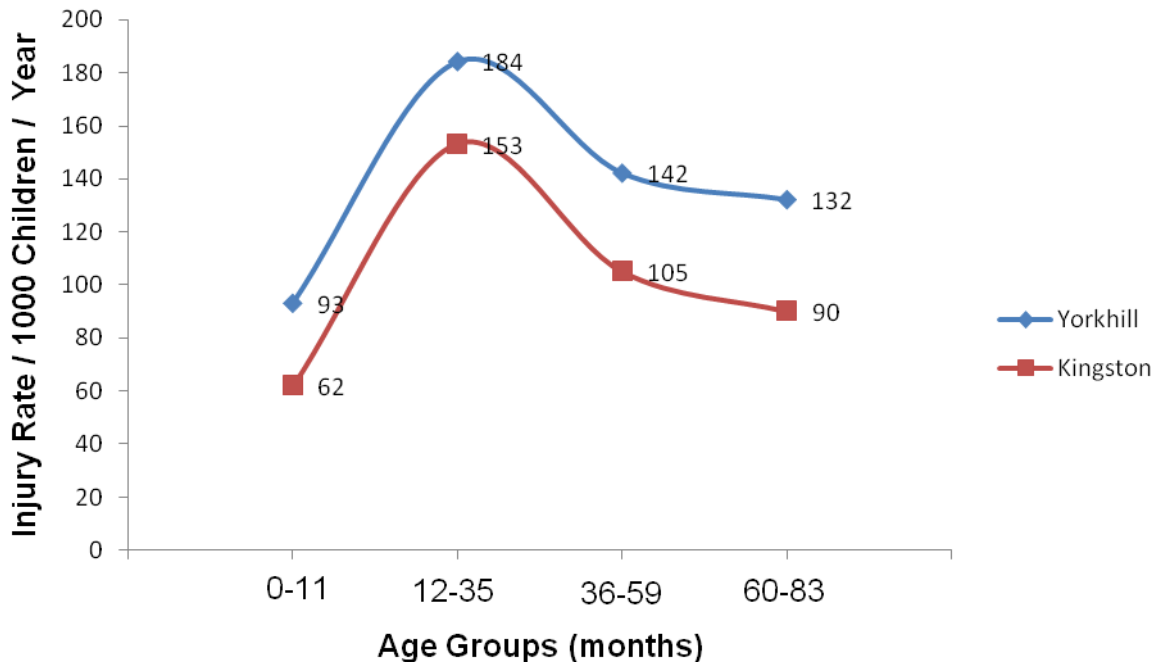

Supplement: MOESM1 [file 9502434]
